# Supplementary material for: Probing the shape of a graphene nanobubble
Source: Royal Society of Chemistry journal article supplement (doi:10.1039/c6cp08535k), 2017-01-01
Supplement: c6cp08535k1.pdf [file c6cp08535k1.pdf]

Supplementary Online Material  
*“Probing the Shape of a Graphene Nanobubble”*

Sandeep K. Jain<sup>1</sup>, Vladimir Juričić<sup>2</sup> and Gerard T. Barkema<sup>3</sup>

<sup>1</sup>Institute for Theoretical Physics, Universiteit Utrecht  
Princetonplein 5, 3584 CC Utrecht, The Netherlands

<sup>2</sup>Nordita, Center for Quantum Materials, KTH Royal Institute of Technology, and Stockholm University  
Roslagstullsbacken 23, S-106 91 Stockholm, Sweden

<sup>3</sup>Department of Information and Computing Science, Universiteit Utrecht  
Princetonplein 5, 3584 CC Utrecht, The Netherlands

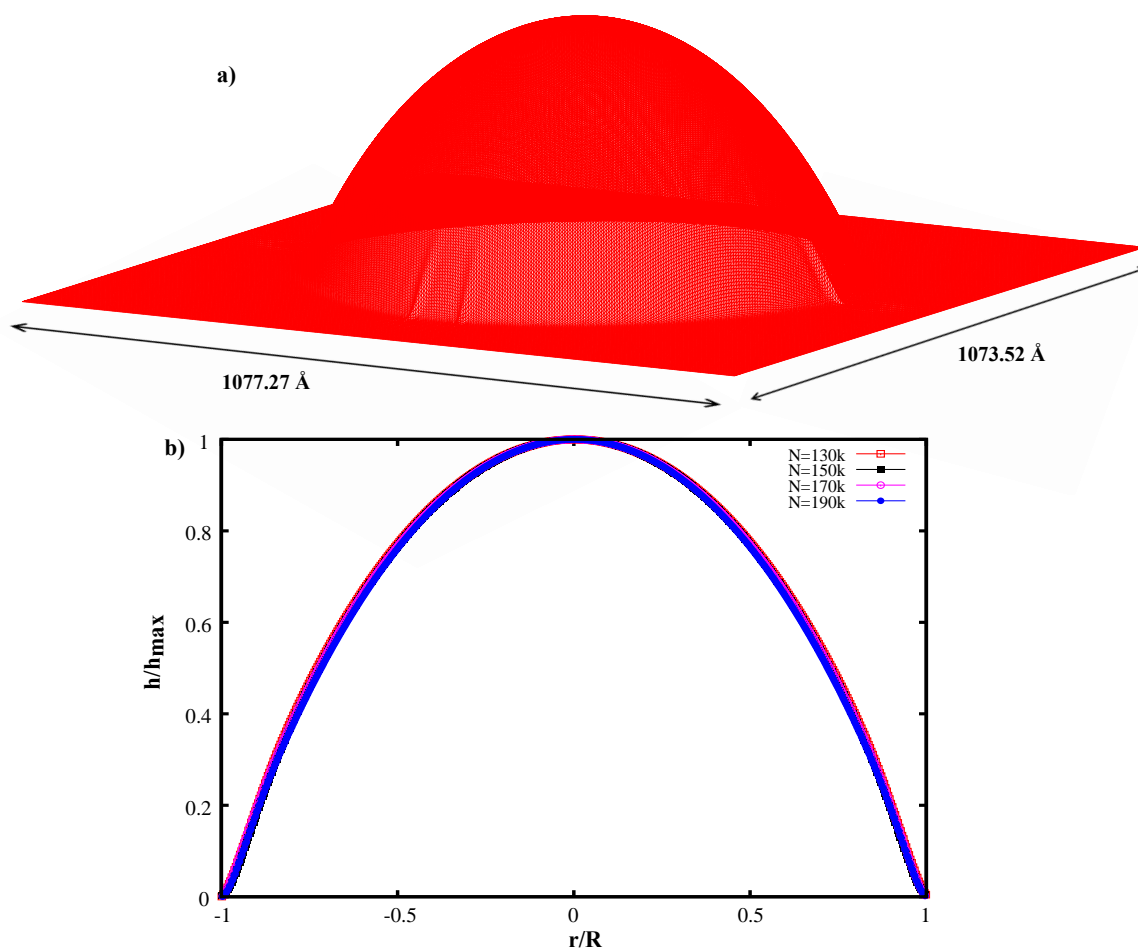

Figure S1: Profile of a large graphene bubble. (a) A gas bubble trapped between a graphene sheet with 441504 carbon atoms and a substrate. (b) The excellent collapse of the data of bubble's profile with varying sizes shows the universal shape of the bubble.
